# Supplementary material for: Physiological and biochemical responses of sugar beet (Beta vulgaris L) to ultraviolet-B radiation
Source: PeerJ. 2019 May 3;7:e6790. doi: 10.7717/peerj.6790 (PMC6501760; doi:10.7717/peerj.6790)
Supplement: Dataset S1 [file peerj-07-6790-s001.xlsx]

## Sheet: Sheet1
			Treatment (UV Dose)	Height	FW	DW	RWC	ChlorophyllA	ChlorophyllB	TotalChlorophyll	Carotenoid	MaximumQuantumYeild	RelativeChlorophyll	PhotosynthesisRate	Proline	FreeAminoAsids	GlycineBetaine	protein	CAT	APX	PPO	Protease	Malondeahdehyde	H2O2	Betalain
			0	16.7	5.78	2.51	0.83	28.79	32.83	61.62	1.73	0.84	17.08	248.25	0.01	0.079	0.002	2.56	0.07	0.11	0.09	0.05	0.24	0.34	0.94
			0	16.3	5.93	2.67	0.88	29.02	20.14	49.17	1.75	0.83	16.59	257.93	0.005	0.071	0.005	2.71	0.07	0.12	0.07	0.05	0.23	0.67	0.82
			0	16.9	5.7	2.6	0.85	30.89	15.11	46.01	1.35	0.87	16.52	262.6	0.006	0.076	0.002	2.23	0.09	0.12	0.08	0.05	0.24	0.91	0.79
			3.042	14.2	5.47	2.25	0.89	20.55	13.68	34.25	1.08	0.79	11.59	87.74	0.009	0.077	0.001	2.47	0.11	0.13	0.14	0.05	0.4	0.42	1
			3.042	15	5	2.19	0.82	20.28	14.33	34.62	0.94	0.81	11.8	90.28	0.004	0.077	0.007	2.26	0.12	0.15	0.12	0.05	0.24	0.73	0.96
			3.042	14.3	5.13	2.21	0.86	21.42	18.05	29.27	1.06	0.68	11.89	90.63	0.008	0.082	0.002	2.77	0.13	0.32	0.17	0.06	0.17	0.49	0.94
			6.084	14.7	5.25	2.04	0.8	19.41	14.18	33.3	0.96	0.75	8.8	67.24	0.013	0.078	0.004	2.98	0.14	0.28	0.15	0.05	0.3	0.25	1.13
			6.084	14.5	5.65	2.17	0.87	19.9	10.72	30.43	1	0.58	9	68.11	0.008	0.071	0.007	2.96	0.14	0.26	0.15	0.06	0.34	0.89	1.24
			6.084	14.5	5.24	2.2	0.88	20.33	10.64	30.98	0.9	0.6	8.7	65.98	0.006	0.076	0.008	3.04	0.15	0.32	0.15	0.05	0.46	0.76	1.2
			9.126	14.5	5	2	0.86	18.45	11.96	30.42	1.05	0.57	7.1	33.61	0.014	0.094	0.007	3	0.17	0.33	0.17	0.06	0.93	0.56	1.53
			9.126	14.1	4.71	2.13	0.89	16.8	11.99	29.88	0.92	0.55	6.8	36.78	0.014	0.09	0.008	2.86	0.17	0.32	0.16	0.06	0.85	0.96	1.45
			9.126	14.5	4.67	2.16	0.8	19.15	11.01	30.16	0.96	0.54	6.9	34.46	0.011	0.097	0.009	2.97	0.17	0.3	0.15	0.05	0.99	0.11	1.4
