# Supplementary material for: Physiological and biochemical responses of sugar beet (Beta vulgaris L) to ultraviolet-B radiation
Source: PeerJ journal article supplement (doi:10.7717/peerj.6790), 2019-05-03
Supplement: Dataset_S3.pdf [file Dataset_S3.pdf]

```

ONEWAY Height FW DW RWC ChlorophyllA ChlorophyllB TotalChlorophyll Carotenoid
MaximumQuantumYeild RelativeChlorophyll PhotosynthesisRate Proline FreeAminoAs
ids GlycineBetaine protein CAT APX PPO Protease Malondeahdehyde H2O2 Betalain
BY Treatment
  /STATISTICS DESCRIPTIVES
  /MISSING ANALYSIS
  /POSTHOC=DUNCAN ALPHA(0.05) .

```

## Oneway

### Notes

|                        |                                                                                                                                                                                                                                                                                                                                         |                                                                                                        |
|------------------------|-----------------------------------------------------------------------------------------------------------------------------------------------------------------------------------------------------------------------------------------------------------------------------------------------------------------------------------------|--------------------------------------------------------------------------------------------------------|
| Output Created         | 25-Nov-2018 14:57:46                                                                                                                                                                                                                                                                                                                    |                                                                                                        |
| Comments               |                                                                                                                                                                                                                                                                                                                                         |                                                                                                        |
| Input                  | Data                                                                                                                                                                                                                                                                                                                                    | C:\Users\Admin\Desktop\Untitled1.sav                                                                   |
|                        | Active Dataset                                                                                                                                                                                                                                                                                                                          | DataSet1                                                                                               |
|                        | Filter                                                                                                                                                                                                                                                                                                                                  | <none>                                                                                                 |
|                        | Weight                                                                                                                                                                                                                                                                                                                                  | <none>                                                                                                 |
|                        | Split File                                                                                                                                                                                                                                                                                                                              | <none>                                                                                                 |
|                        | N of Rows in Working Data File                                                                                                                                                                                                                                                                                                          | 12                                                                                                     |
| Missing Value Handling | Definition of Missing                                                                                                                                                                                                                                                                                                                   | User-defined missing values are treated as missing.                                                    |
|                        | Cases Used                                                                                                                                                                                                                                                                                                                              | Statistics for each analysis are based on cases with no missing data for any variable in the analysis. |
| Syntax                 | ONEWAY Height FW DW RWC ChlorophyllA ChlorophyllB TotalChlorophyll Carotenoid MaximumQuantumYeild RelativeChlorophyll PhotosynthesisRate Proline FreeAminoAsids GlycineBetaine protein CAT APX PPO Protease Malondeahdehyde H2O2 Betalain BY Treatment<br>/STATISTICS DESCRIPTIVES<br>/MISSING ANALYSIS<br>/POSTHOC=DUNCAN ALPHA(0.05). |                                                                                                        |
| Resources              | Processor Time                                                                                                                                                                                                                                                                                                                          | 00:00:01.935                                                                                           |
|                        | Elapsed Time                                                                                                                                                                                                                                                                                                                            | 00:00:02.225                                                                                           |

[DataSet1] C:\Users\Admin\Desktop\Untitled1.sav

### Descriptives

|                  |       | N  | Mean    | Std. Deviation | Std. Error |
|------------------|-------|----|---------|----------------|------------|
| Height           | 0     | 3  | 16.6333 | .30551         | .17638     |
|                  | 3.042 | 3  | 14.5000 | .43589         | .25166     |
|                  | 6.084 | 3  | 14.5667 | .11547         | .06667     |
|                  | 9.126 | 3  | 14.3667 | .23094         | .13333     |
|                  | Total | 12 | 15.0167 | 1.00980        | .29150     |
| FW               | 0     | 3  | 5.8033  | .11676         | .06741     |
|                  | 3.042 | 3  | 5.2000  | .24269         | .14012     |
|                  | 6.084 | 3  | 5.3800  | .23388         | .13503     |
|                  | 9.126 | 3  | 4.7933  | .18009         | .10398     |
|                  | Total | 12 | 5.2942  | .41542         | .11992     |
| DW               | 0     | 3  | 2.5933  | .08021         | .04631     |
|                  | 3.042 | 3  | 2.2167  | .03055         | .01764     |
|                  | 6.084 | 3  | 2.1367  | .08505         | .04910     |
|                  | 9.126 | 3  | 2.0967  | .08505         | .04910     |
|                  | Total | 12 | 2.2608  | .21496         | .06205     |
| RWC              | 0     | 3  | .8533   | .02517         | .01453     |
|                  | 3.042 | 3  | .8567   | .03512         | .02028     |
|                  | 6.084 | 3  | .8500   | .04359         | .02517     |
|                  | 9.126 | 3  | .8500   | .04583         | .02646     |
|                  | Total | 12 | .8525   | .03279         | .00946     |
| ChlorophyllA     | 0     | 3  | 29.5667 | 1.15180        | .66499     |
|                  | 3.042 | 3  | 20.7500 | .59573         | .34395     |
|                  | 6.084 | 3  | 19.8800 | .46033         | .26577     |
|                  | 9.126 | 3  | 18.1333 | 1.20658        | .69662     |
|                  | Total | 12 | 22.0825 | 4.68464        | 1.35234    |
| ChlorophyllB     | 0     | 3  | 22.6933 | 9.13177        | 5.27223    |
|                  | 3.042 | 3  | 15.3533 | 2.35789        | 1.36133    |
|                  | 6.084 | 3  | 11.8467 | 2.02112        | 1.16690    |
|                  | 9.126 | 3  | 11.6533 | .55734         | .32178     |
|                  | Total | 12 | 15.3867 | 6.22504        | 1.79701    |
| TotalChlorophyll | 0     | 3  | 52.2667 | 8.25288        | 4.76480    |
|                  | 3.042 | 3  | 32.7133 | 2.98775        | 1.72498    |
|                  | 6.084 | 3  | 31.5700 | 1.52325        | .87945     |
|                  | 9.126 | 3  | 30.1533 | .27006         | .15592     |
|                  | Total | 12 | 36.6758 | 10.18477       | 2.94009    |

**Descriptives**

|                  |       | 95% Confidence Interval for Mean |             | Minimum | Maximum |
|------------------|-------|----------------------------------|-------------|---------|---------|
|                  |       | Lower Bound                      | Upper Bound |         |         |
| Height           | 0     | 15.8744                          | 17.3922     | 16.30   | 16.90   |
|                  | 3.042 | 13.4172                          | 15.5828     | 14.20   | 15.00   |
|                  | 6.084 | 14.2798                          | 14.8535     | 14.50   | 14.70   |
|                  | 9.126 | 13.7930                          | 14.9404     | 14.10   | 14.50   |
|                  | Total | 14.3751                          | 15.6583     | 14.10   | 16.90   |
| FW               | 0     | 5.5133                           | 6.0934      | 5.70    | 5.93    |
|                  | 3.042 | 4.5971                           | 5.8029      | 5.00    | 5.47    |
|                  | 6.084 | 4.7990                           | 5.9610      | 5.24    | 5.65    |
|                  | 9.126 | 4.3460                           | 5.2407      | 4.67    | 5.00    |
|                  | Total | 5.0302                           | 5.5581      | 4.67    | 5.93    |
| DW               | 0     | 2.3941                           | 2.7926      | 2.51    | 2.67    |
|                  | 3.042 | 2.1408                           | 2.2926      | 2.19    | 2.25    |
|                  | 6.084 | 1.9254                           | 2.3479      | 2.04    | 2.20    |
|                  | 9.126 | 1.8854                           | 2.3079      | 2.00    | 2.16    |
|                  | Total | 2.1243                           | 2.3974      | 2.00    | 2.67    |
| RWC              | 0     | .7908                            | .9158       | .83     | .88     |
|                  | 3.042 | .7694                            | .9439       | .82     | .89     |
|                  | 6.084 | .7417                            | .9583       | .80     | .88     |
|                  | 9.126 | .7362                            | .9638       | .80     | .89     |
|                  | Total | .8317                            | .8733       | .80     | .89     |
| ChlorophyllA     | 0     | 26.7054                          | 32.4279     | 28.79   | 30.89   |
|                  | 3.042 | 19.2701                          | 22.2299     | 20.28   | 21.42   |
|                  | 6.084 | 18.7365                          | 21.0235     | 19.41   | 20.33   |
|                  | 9.126 | 15.1360                          | 21.1306     | 16.80   | 19.15   |
|                  | Total | 19.1060                          | 25.0590     | 16.80   | 30.89   |
| ChlorophyllB     | 0     | .0088                            | 45.3779     | 15.11   | 32.83   |
|                  | 3.042 | 9.4960                           | 21.2107     | 13.68   | 18.05   |
|                  | 6.084 | 6.8259                           | 16.8674     | 10.64   | 14.18   |
|                  | 9.126 | 10.2688                          | 13.0379     | 11.01   | 11.99   |
|                  | Total | 11.4315                          | 19.3419     | 10.64   | 32.83   |
| TotalChlorophyll | 0     | 31.7654                          | 72.7680     | 46.01   | 61.62   |
|                  | 3.042 | 25.2914                          | 40.1353     | 29.27   | 34.62   |
|                  | 6.084 | 27.7860                          | 35.3540     | 30.43   | 33.30   |
|                  | 9.126 | 29.4825                          | 30.8242     | 29.88   | 30.42   |
|                  | Total | 30.2047                          | 43.1469     | 29.27   | 61.62   |

### Descriptives

|                     |       | N  | Mean     | Std. Deviation | Std. Error |
|---------------------|-------|----|----------|----------------|------------|
| Carotenoid          | 0     | 3  | 1.6100   | .22539         | .13013     |
|                     | 3.042 | 3  | 1.0267   | .07572         | .04372     |
|                     | 6.084 | 3  | .9533    | .05033         | .02906     |
|                     | 9.126 | 3  | .9767    | .06658         | .03844     |
|                     | Total | 12 | 1.1417   | .30343         | .08759     |
| MaximumQuantumYeild | 0     | 3  | .8460    | .02524         | .01457     |
|                     | 3.042 | 3  | .7593    | .07022         | .04054     |
|                     | 6.084 | 3  | .6437    | .09349         | .05398     |
|                     | 9.126 | 3  | .5533    | .01528         | .00882     |
|                     | Total | 12 | .7006    | .12708         | .03668     |
| RelativeChlorophyll | 0     | 3  | 16.7300  | .30512         | .17616     |
|                     | 3.042 | 3  | 11.7600  | .15395         | .08888     |
|                     | 6.084 | 3  | 8.8333   | .15275         | .08819     |
|                     | 9.126 | 3  | 6.9333   | .15275         | .08819     |
|                     | Total | 12 | 11.0642  | 3.86365        | 1.11534    |
| PhotosynthesisRate  | 0     | 3  | 256.2600 | 7.31931        | 4.22581    |
|                     | 3.042 | 3  | 89.5500  | 1.57724        | .91062     |
|                     | 6.084 | 3  | 67.1100  | 1.07093        | .61830     |
|                     | 9.126 | 3  | 34.9500  | 1.64082        | .94733     |
|                     | Total | 12 | 111.9675 | 89.40209       | 25.80816   |
| Proline             | 0     | 3  | .00700   | .002646        | .001528    |
|                     | 3.042 | 3  | .00700   | .002646        | .001528    |
|                     | 6.084 | 3  | .00900   | .003606        | .002082    |
|                     | 9.126 | 3  | .01300   | .001732        | .001000    |
|                     | Total | 12 | .00900   | .003464        | .001000    |
| FreeAminoAsids      | 0     | 3  | .07540   | .003974        | .002294    |
|                     | 3.042 | 3  | .07850   | .002689        | .001552    |
|                     | 6.084 | 3  | .07483   | .003482        | .002010    |
|                     | 9.126 | 3  | .09367   | .003512        | .002028    |
|                     | Total | 12 | .08060   | .008535        | .002464    |
| GlycineBetaine      | 0     | 3  | .00300   | .001732        | .001000    |
|                     | 3.042 | 3  | .00333   | .003215        | .001856    |
|                     | 6.084 | 3  | .00633   | .002082        | .001202    |
|                     | 9.126 | 3  | .00800   | .001000        | .000577    |
|                     | Total | 12 | .00517   | .002855        | .000824    |

### Descriptives

|                     |       | 95% Confidence Interval for Mean |             | Minimum | Maximum |
|---------------------|-------|----------------------------------|-------------|---------|---------|
|                     |       | Lower Bound                      | Upper Bound |         |         |
| Carotenoid          | 0     | 1.0501                           | 2.1699      | 1.35    | 1.75    |
|                     | 3.042 | .8386                            | 1.2148      | .94     | 1.08    |
|                     | 6.084 | .8283                            | 1.0784      | .90     | 1.00    |
|                     | 9.126 | .8113                            | 1.1421      | .92     | 1.05    |
|                     | Total | .9489                            | 1.3345      | .90     | 1.75    |
| MaximumQuantumYeild | 0     | .7833                            | .9087       | .83     | .87     |
|                     | 3.042 | .5849                            | .9338       | .68     | .81     |
|                     | 6.084 | .4114                            | .8759       | .58     | .75     |
|                     | 9.126 | .5154                            | .5913       | .54     | .57     |
|                     | Total | .6198                            | .7813       | .54     | .87     |
| RelativeChlorophyll | 0     | 15.9720                          | 17.4880     | 16.52   | 17.08   |
|                     | 3.042 | 11.3776                          | 12.1424     | 11.59   | 11.89   |
|                     | 6.084 | 8.4539                           | 9.2128      | 8.70    | 9.00    |
|                     | 9.126 | 6.5539                           | 7.3128      | 6.80    | 7.10    |
|                     | Total | 8.6093                           | 13.5190     | 6.80    | 17.08   |
| PhotosynthesisRate  | 0     | 238.0778                         | 274.4422    | 248.25  | 262.60  |
|                     | 3.042 | 85.6319                          | 93.4681     | 87.74   | 90.63   |
|                     | 6.084 | 64.4497                          | 69.7703     | 65.98   | 68.11   |
|                     | 9.126 | 30.8740                          | 39.0260     | 33.61   | 36.78   |
|                     | Total | 55.1641                          | 168.7709    | 33.61   | 262.60  |
| Proline             | 0     | .00043                           | .01357      | .005    | .010    |
|                     | 3.042 | .00043                           | .01357      | .004    | .009    |
|                     | 6.084 | .00004                           | .01796      | .006    | .013    |
|                     | 9.126 | .00870                           | .01730      | .011    | .014    |
|                     | Total | .00680                           | .01120      | .004    | .014    |
| FreeAminoAsids      | 0     | .06553                           | .08527      | .071    | .079    |
|                     | 3.042 | .07182                           | .08518      | .077    | .082    |
|                     | 6.084 | .06618                           | .08348      | .071    | .078    |
|                     | 9.126 | .08494                           | .10239      | .090    | .097    |
|                     | Total | .07518                           | .08602      | .071    | .097    |
| GlycineBetaine      | 0     | -.00130                          | .00730      | .002    | .005    |
|                     | 3.042 | -.00465                          | .01132      | .001    | .007    |
|                     | 6.084 | .00116                           | .01150      | .004    | .008    |
|                     | 9.126 | .00552                           | .01048      | .007    | .009    |
|                     | Total | .00335                           | .00698      | .001    | .009    |

### Descriptives

|                 |       | N  | Mean   | Std. Deviation | Std. Error |
|-----------------|-------|----|--------|----------------|------------|
| protein         | 0     | 3  | 2.5000 | .24556         | .14177     |
|                 | 3.042 | 3  | 2.5000 | .25632         | .14799     |
|                 | 6.084 | 3  | 2.9933 | .04163         | .02404     |
|                 | 9.126 | 3  | 2.9433 | .07371         | .04256     |
|                 | Total | 12 | 2.7342 | .29047         | .08385     |
| CAT             | 0     | 3  | .0753  | .00929         | .00536     |
|                 | 3.042 | 3  | .1217  | .00961         | .00555     |
|                 | 6.084 | 3  | .1440  | .00458         | .00265     |
|                 | 9.126 | 3  | .1693  | .00379         | .00219     |
|                 | Total | 12 | .1276  | .03663         | .01057     |
| APX             | 0     | 3  | .1160  | .00500         | .00289     |
|                 | 3.042 | 3  | .1997  | .10704         | .06180     |
|                 | 6.084 | 3  | .2853  | .02838         | .01638     |
|                 | 9.126 | 3  | .3147  | .01474         | .00851     |
|                 | Total | 12 | .2289  | .09412         | .02717     |
| PPO             | 0     | 3  | .0797  | .00814         | .00470     |
|                 | 3.042 | 3  | .1420  | .02784         | .01607     |
|                 | 6.084 | 3  | .1477  | .00231         | .00133     |
|                 | 9.126 | 3  | .1597  | .00757         | .00437     |
|                 | Total | 12 | .1323  | .03485         | .01006     |
| Protease        | 0     | 3  | .0487  | .00404         | .00233     |
|                 | 3.042 | 3  | .0527  | .00416         | .00240     |
|                 | 6.084 | 3  | .0550  | .00265         | .00153     |
|                 | 9.126 | 3  | .0553  | .00153         | .00088     |
|                 | Total | 12 | .0529  | .00394         | .00114     |
| Malondeahdehyde | 0     | 3  | .2367  | .00577         | .00333     |
|                 | 3.042 | 3  | .2700  | .11790         | .06807     |
|                 | 6.084 | 3  | .3667  | .08327         | .04807     |
|                 | 9.126 | 3  | .9233  | .07024         | .04055     |
|                 | Total | 12 | .4492  | .29822         | .08609     |
| H2O2            | 0     | 3  | .6400  | .28618         | .16523     |
|                 | 3.042 | 3  | .5467  | .16258         | .09387     |
|                 | 6.084 | 3  | .6333  | .33828         | .19531     |
|                 | 9.126 | 3  | .5433  | .42525         | .24552     |
|                 | Total | 12 | .5908  | .27510         | .07942     |

### Descriptives

|                 |       | 95% Confidence Interval for Mean |             | Minimum | Maximum |
|-----------------|-------|----------------------------------|-------------|---------|---------|
|                 |       | Lower Bound                      | Upper Bound |         |         |
| protein         | 0     | 1.8900                           | 3.1100      | 2.23    | 2.71    |
|                 | 3.042 | 1.8633                           | 3.1367      | 2.26    | 2.77    |
|                 | 6.084 | 2.8899                           | 3.0968      | 2.96    | 3.04    |
|                 | 9.126 | 2.7602                           | 3.1264      | 2.86    | 3.00    |
|                 | Total | 2.5496                           | 2.9187      | 2.23    | 3.04    |
| CAT             | 0     | .0523                            | .0984       | .07     | .09     |
|                 | 3.042 | .0978                            | .1455       | .11     | .13     |
|                 | 6.084 | .1326                            | .1554       | .14     | .15     |
|                 | 9.126 | .1599                            | .1787       | .17     | .17     |
|                 | Total | .1043                            | .1509       | .07     | .17     |
| APX             | 0     | .1036                            | .1284       | .11     | .12     |
|                 | 3.042 | -.0662                           | .4656       | .13     | .32     |
|                 | 6.084 | .2148                            | .3558       | .26     | .32     |
|                 | 9.126 | .2780                            | .3513       | .30     | .33     |
|                 | Total | .1691                            | .2887       | .11     | .33     |
| PPO             | 0     | .0594                            | .0999       | .07     | .09     |
|                 | 3.042 | .0728                            | .2112       | .12     | .17     |
|                 | 6.084 | .1419                            | .1534       | .14     | .15     |
|                 | 9.126 | .1409                            | .1785       | .15     | .17     |
|                 | Total | .1101                            | .1544       | .07     | .17     |
| Protease        | 0     | .0386                            | .0587       | .05     | .05     |
|                 | 3.042 | .0423                            | .0630       | .05     | .06     |
|                 | 6.084 | .0484                            | .0616       | .05     | .06     |
|                 | 9.126 | .0515                            | .0591       | .05     | .06     |
|                 | Total | .0504                            | .0554       | .05     | .06     |
| Malondeahdehyde | 0     | .2223                            | .2510       | .23     | .24     |
|                 | 3.042 | -.0229                           | .5629       | .17     | .40     |
|                 | 6.084 | .1598                            | .5735       | .30     | .46     |
|                 | 9.126 | .7489                            | 1.0978      | .85     | .99     |
|                 | Total | .2597                            | .6386       | .17     | .99     |
| H2O2            | 0     | -.0709                           | 1.3509      | .34     | .91     |
|                 | 3.042 | .1428                            | .9505       | .42     | .73     |
|                 | 6.084 | -.2070                           | 1.4737      | .25     | .89     |
|                 | 9.126 | -.5130                           | 1.5997      | .11     | .96     |
|                 | Total | .4160                            | .7656       | .11     | .96     |

**Descriptives**

|          |       | N  | Mean   | Std. Deviation | Std. Error |
|----------|-------|----|--------|----------------|------------|
| Betalain | 0     | 3  | .8500  | .07937         | .04583     |
|          | 3.042 | 3  | .9667  | .03055         | .01764     |
|          | 6.084 | 3  | 1.1900 | .05568         | .03215     |
|          | 9.126 | 3  | 1.4600 | .06557         | .03786     |
|          | Total | 12 | 1.1167 | .24861         | .07177     |

**Descriptives**

|          |       | 95% Confidence Interval for Mean |             | Minimum | Maximum |
|----------|-------|----------------------------------|-------------|---------|---------|
|          |       | Lower Bound                      | Upper Bound |         |         |
| Betalain | 0     | .6528                            | 1.0472      | .79     | .94     |
|          | 3.042 | .8908                            | 1.0426      | .94     | 1.00    |
|          | 6.084 | 1.0517                           | 1.3283      | 1.13    | 1.24    |
|          | 9.126 | 1.2971                           | 1.6229      | 1.40    | 1.53    |
|          | Total | .9587                            | 1.2746      | .79     | 1.53    |

**ANOVA**

|              |                | Sum of Squares | df | Mean Square |
|--------------|----------------|----------------|----|-------------|
| Height       | Between Groups | 10.517         | 3  | 3.506       |
|              | Within Groups  | .700           | 8  | .087        |
|              | Total          | 11.217         | 11 |             |
| FW           | Between Groups | 1.579          | 3  | .526        |
|              | Within Groups  | .319           | 8  | .040        |
|              | Total          | 1.898          | 11 |             |
| DW           | Between Groups | .465           | 3  | .155        |
|              | Within Groups  | .044           | 8  | .005        |
|              | Total          | .508           | 11 |             |
| RWC          | Between Groups | .000           | 3  | .000        |
|              | Within Groups  | .012           | 8  | .001        |
|              | Total          | .012           | 11 |             |
| ChlorophyllA | Between Groups | 234.706        | 3  | 78.235      |
|              | Within Groups  | 6.699          | 8  | .837        |
|              | Total          | 241.404        | 11 |             |
| ChlorophyllB | Between Groups | 239.574        | 3  | 79.858      |
|              | Within Groups  | 186.689        | 8  | 23.336      |



ANOVA

|              |                | F      | Sig. |
|--------------|----------------|--------|------|
| Height       | Between Groups | 40.063 | .000 |
|              | Within Groups  |        |      |
|              | Total          |        |      |
| FW           | Between Groups | 13.185 | .002 |
|              | Within Groups  |        |      |
|              | Total          |        |      |
| DW           | Between Groups | 28.374 | .000 |
|              | Within Groups  |        |      |
|              | Total          |        |      |
| RWC          | Between Groups | .021   | .996 |
|              | Within Groups  |        |      |
|              | Total          |        |      |
| ChlorophyllA | Between Groups | 93.436 | .000 |
|              | Within Groups  |        |      |
|              | Total          |        |      |
| ChlorophyllB | Between Groups | 3.422  | .073 |
|              | Within Groups  |        |      |

**ANOVA**

|                     |                | Sum of Squares | df | Mean Square |
|---------------------|----------------|----------------|----|-------------|
| ChlorophyllB        | Total          | 426.262        | 11 |             |
| TotalChlorophyll    | Between Groups | 982.164        | 3  | 327.388     |
|                     | Within Groups  | 158.860        | 8  | 19.857      |
|                     | Total          | 1141.024       | 11 |             |
| Carotenoid          | Between Groups | .886           | 3  | .295        |
|                     | Within Groups  | .127           | 8  | .016        |
|                     | Total          | 1.013          | 11 |             |
| MaximumQuantumYeild | Between Groups | .149           | 3  | .050        |
|                     | Within Groups  | .029           | 8  | .004        |
|                     | Total          | .178           | 11 |             |
| RelativeChlorophyll | Between Groups | 163.879        | 3  | 54.626      |
|                     | Within Groups  | .327           | 8  | .041        |
|                     | Total          | 164.206        | 11 |             |
| PhotosynthesisRate  | Between Groups | 87800.281      | 3  | 29266.760   |
|                     | Within Groups  | 119.798        | 8  | 14.975      |
|                     | Total          | 87920.080      | 11 |             |
| Proline             | Between Groups | .000           | 3  | .000        |
|                     | Within Groups  | .000           | 8  | .000        |
|                     | Total          | .000           | 11 |             |
| FreeAminoAsids      | Between Groups | .001           | 3  | .000        |
|                     | Within Groups  | .000           | 8  | .000        |
|                     | Total          | .001           | 11 |             |
| GlycineBetaine      | Between Groups | .000           | 3  | .000        |
|                     | Within Groups  | .000           | 8  | .000        |
|                     | Total          | .000           | 11 |             |
| protein             | Between Groups | .662           | 3  | .221        |
|                     | Within Groups  | .266           | 8  | .033        |
|                     | Total          | .928           | 11 |             |
| CAT                 | Between Groups | .014           | 3  | .005        |
|                     | Within Groups  | .000           | 8  | .000        |
|                     | Total          | .015           | 11 |             |
| APX                 | Between Groups | .072           | 3  | .024        |
|                     | Within Groups  | .025           | 8  | .003        |

ANOVA

|                     |                | F        | Sig. |
|---------------------|----------------|----------|------|
| ChlorophyllB        | Total          |          |      |
| TotalChlorophyll    | Between Groups | 16.487   | .001 |
|                     | Within Groups  |          |      |
|                     | Total          |          |      |
| Carotenoid          | Between Groups | 18.599   | .001 |
|                     | Within Groups  |          |      |
|                     | Total          |          |      |
| MaximumQuantumYeild | Between Groups | 13.622   | .002 |
|                     | Within Groups  |          |      |
|                     | Total          |          |      |
| RelativeChlorophyll | Between Groups | 1336.695 | .000 |
|                     | Within Groups  |          |      |
|                     | Total          |          |      |
| PhotosynthesisRate  | Between Groups | 1954.401 | .000 |
|                     | Within Groups  |          |      |
|                     | Total          |          |      |
| Proline             | Between Groups | 3.200    | .084 |
|                     | Within Groups  |          |      |
|                     | Total          |          |      |
| FreeAminoAsids      | Between Groups | 19.836   | .000 |
|                     | Within Groups  |          |      |
|                     | Total          |          |      |
| GlycineBetaine      | Between Groups | 3.738    | .060 |
|                     | Within Groups  |          |      |
|                     | Total          |          |      |
| protein             | Between Groups | 6.626    | .015 |
|                     | Within Groups  |          |      |
|                     | Total          |          |      |
| CAT                 | Between Groups | 89.302   | .000 |
|                     | Within Groups  |          |      |
|                     | Total          |          |      |
| APX                 | Between Groups | 7.722    | .010 |
|                     | Within Groups  |          |      |

**ANOVA**

|                 |                | Sum of Squares | df | Mean Square |
|-----------------|----------------|----------------|----|-------------|
| APX             | Total          | .097           | 11 |             |
| PPO             | Between Groups | .012           | 3  | .004        |
|                 | Within Groups  | .002           | 8  | .000        |
|                 | Total          | .013           | 11 |             |
| Protease        | Between Groups | .000           | 3  | .000        |
|                 | Within Groups  | .000           | 8  | .000        |
|                 | Total          | .000           | 11 |             |
| Malondeahdehyde | Between Groups | .927           | 3  | .309        |
|                 | Within Groups  | .052           | 8  | .006        |
|                 | Total          | .978           | 11 |             |
| H2O2            | Between Groups | .025           | 3  | .008        |
|                 | Within Groups  | .807           | 8  | .101        |
|                 | Total          | .832           | 11 |             |
| Betain          | Between Groups | .651           | 3  | .217        |
|                 | Within Groups  | .029           | 8  | .004        |
|                 | Total          | .680           | 11 |             |

**ANOVA**

|                 |                | F      | Sig. |
|-----------------|----------------|--------|------|
| APX             | Total          |        |      |
| PPO             | Between Groups | 17.033 | .001 |
|                 | Within Groups  |        |      |
|                 | Total          |        |      |
| Protease        | Between Groups | 2.633  | .122 |
|                 | Within Groups  |        |      |
|                 | Total          |        |      |
| Malondeahdehyde | Between Groups | 47.891 | .000 |
|                 | Within Groups  |        |      |
|                 | Total          |        |      |
| H2O2            | Between Groups | .084   | .967 |
|                 | Within Groups  |        |      |
|                 | Total          |        |      |
| Betain          | Between Groups | 59.280 | .000 |
|                 | Within Groups  |        |      |
|                 | Total          |        |      |

**Post Hoc Tests**

## Homogeneous Subsets

### Height

Duncan<sup>a</sup>

| Treatment | N | Subset for alpha = 0.05 |         |
|-----------|---|-------------------------|---------|
|           |   | 1                       | 2       |
| 9.126     | 3 | 14.3667                 |         |
| 3.042     | 3 | 14.5000                 |         |
| 6.084     | 3 | 14.5667                 |         |
| 0         | 3 |                         | 16.6333 |
| Sig.      |   | .450                    | 1.000   |

Means for groups in homogeneous subsets are displayed.

a. Uses Harmonic Mean Sample Size = 3.000.

### FW

Duncan<sup>a</sup>

| Treatment | N | Subset for alpha = 0.05 |        |        |
|-----------|---|-------------------------|--------|--------|
|           |   | 1                       | 2      | 3      |
| 9.126     | 3 | 4.7933                  |        |        |
| 3.042     | 3 |                         | 5.2000 |        |
| 6.084     | 3 |                         | 5.3800 |        |
| 0         | 3 |                         |        | 5.8033 |
| Sig.      |   | 1.000                   | .302   | 1.000  |

Means for groups in homogeneous subsets are displayed.

a. Uses Harmonic Mean Sample Size = 3.000.

### DW

Duncan<sup>a</sup>

| Treatment | N | Subset for alpha = 0.05 |        |
|-----------|---|-------------------------|--------|
|           |   | 1                       | 2      |
| 9.126     | 3 | 2.0967                  |        |
| 6.084     | 3 | 2.1367                  |        |
| 3.042     | 3 | 2.2167                  |        |
| 0         | 3 |                         | 2.5933 |
| Sig.      |   | .093                    | 1.000  |

Means for groups in homogeneous subsets are displayed.

a. Uses Harmonic Mean Sample Size = 3.000.

**RWC**

Duncan<sup>a</sup>

| Treatment | N | Subset for alpha = 0.05 |
|-----------|---|-------------------------|
|           |   | 1                       |
| 6.084     | 3 | .8500                   |
| 9.126     | 3 | .8500                   |
| 0         | 3 | .8533                   |
| 3.042     | 3 | .8567                   |
| Sig.      |   | .845                    |

Means for groups in homogeneous subsets are displayed.

a. Uses Harmonic Mean Sample Size = 3.000.

**ChlorophyllA**

Duncan<sup>a</sup>

| Treatment | N | Subset for alpha = 0.05 |         |         |
|-----------|---|-------------------------|---------|---------|
|           |   | 1                       | 2       | 3       |
| 9.126     | 3 | 18.1333                 |         |         |
| 6.084     | 3 |                         | 19.8800 |         |
| 3.042     | 3 |                         | 20.7500 |         |
| 0         | 3 |                         |         | 29.5667 |
| Sig.      |   | 1.000                   | .278    | 1.000   |

Means for groups in homogeneous subsets are displayed.

a. Uses Harmonic Mean Sample Size = 3.000.

**ChlorophyllB**

Duncan<sup>a</sup>

| Treatment | N | Subset for alpha = 0.05 |         |
|-----------|---|-------------------------|---------|
|           |   | 1                       | 2       |
| 9.126     | 3 | 11.6533                 |         |
| 6.084     | 3 | 11.8467                 |         |
| 3.042     | 3 | 15.3533                 | 15.3533 |
| 0         | 3 |                         | 22.6933 |
| Sig.      |   | .394                    | .100    |

Means for groups in homogeneous subsets are displayed.

a. Uses Harmonic Mean Sample Size = 3.000.

### TotalChlorophyll

Duncan<sup>a</sup>

| Treatment | N | Subset for alpha = 0.05 |         |
|-----------|---|-------------------------|---------|
|           |   | 1                       | 2       |
| 9.126     | 3 | 30.1533                 |         |
| 6.084     | 3 | 31.5700                 |         |
| 3.042     | 3 | 32.7133                 |         |
| 0         | 3 |                         | 52.2667 |
| Sig.      |   | .519                    | 1.000   |

Means for groups in homogeneous subsets are displayed.

a. Uses Harmonic Mean Sample Size = 3.000.

### Carotenoid

Duncan<sup>a</sup>

| Treatment | N | Subset for alpha = 0.05 |        |
|-----------|---|-------------------------|--------|
|           |   | 1                       | 2      |
| 6.084     | 3 | .9533                   |        |
| 9.126     | 3 | .9767                   |        |
| 3.042     | 3 | 1.0267                  |        |
| 0         | 3 |                         | 1.6100 |
| Sig.      |   | .513                    | 1.000  |

Means for groups in homogeneous subsets are displayed.

a. Uses Harmonic Mean Sample Size = 3.000.

### MaximumQuantumYeild

Duncan<sup>a</sup>

| Treatment | N | Subset for alpha = 0.05 |       |
|-----------|---|-------------------------|-------|
|           |   | 1                       | 2     |
| 9.126     | 3 | .5533                   |       |
| 6.084     | 3 | .6437                   |       |
| 3.042     | 3 |                         | .7593 |
| 0         | 3 |                         | .8460 |
| Sig.      |   | .104                    | .116  |

Means for groups in homogeneous subsets are displayed.

a. Uses Harmonic Mean Sample Size = 3.000.

### RelativeChlorophyll

Duncan<sup>a</sup>

| Treatment | N | Subset for alpha = 0.05 |        |         |         |
|-----------|---|-------------------------|--------|---------|---------|
|           |   | 1                       | 2      | 3       | 4       |
| 9.126     | 3 | 6.9333                  |        |         |         |
| 6.084     | 3 |                         | 8.8333 |         |         |
| 3.042     | 3 |                         |        | 11.7600 |         |
| 0         | 3 |                         |        |         | 16.7300 |
| Sig.      |   | 1.000                   | 1.000  | 1.000   | 1.000   |

Means for groups in homogeneous subsets are displayed.

a. Uses Harmonic Mean Sample Size = 3.000.

### PhotosynthesisRate

Duncan<sup>a</sup>

| Treatment | N | Subset for alpha = 0.05 |         |         |          |
|-----------|---|-------------------------|---------|---------|----------|
|           |   | 1                       | 2       | 3       | 4        |
| 9.126     | 3 | 34.9500                 |         |         |          |
| 6.084     | 3 |                         | 67.1100 |         |          |
| 3.042     | 3 |                         |         | 89.5500 |          |
| 0         | 3 |                         |         |         | 256.2600 |
| Sig.      |   | 1.000                   | 1.000   | 1.000   | 1.000    |

Means for groups in homogeneous subsets are displayed.

a. Uses Harmonic Mean Sample Size = 3.000.

### Proline

Duncan<sup>a</sup>

| Treatment | N | Subset for alpha = 0.05 |        |
|-----------|---|-------------------------|--------|
|           |   | 1                       | 2      |
| 0         | 3 | .00700                  |        |
| 3.042     | 3 | .00700                  |        |
| 6.084     | 3 | .00900                  | .00900 |
| 9.126     | 3 |                         | .01300 |
| Sig.      |   | .416                    | .111   |

Means for groups in homogeneous subsets are displayed.

a. Uses Harmonic Mean Sample Size = 3.000.



### FreeAminoAsids

Duncan<sup>a</sup>

| Treatment | N | Subset for alpha = 0.05 |        |
|-----------|---|-------------------------|--------|
|           |   | 1                       | 2      |
| 6.084     | 3 | .07483                  |        |
| 0         | 3 | .07540                  |        |
| 3.042     | 3 | .07850                  |        |
| 9.126     | 3 |                         | .09367 |
| Sig.      |   | .246                    | 1.000  |

Means for groups in homogeneous subsets are displayed.

a. Uses Harmonic Mean Sample Size = 3.000.

### GlycineBetaine

Duncan<sup>a</sup>

| Treatment | N | Subset for alpha = 0.05 |        |
|-----------|---|-------------------------|--------|
|           |   | 1                       | 2      |
| 0         | 3 | .00300                  |        |
| 3.042     | 3 | .00333                  |        |
| 6.084     | 3 | .00633                  | .00633 |
| 9.126     | 3 |                         | .00800 |
| Sig.      |   | .107                    | .372   |

Means for groups in homogeneous subsets are displayed.

a. Uses Harmonic Mean Sample Size = 3.000.

### protein

Duncan<sup>a</sup>

| Treatment | N | Subset for alpha = 0.05 |        |
|-----------|---|-------------------------|--------|
|           |   | 1                       | 2      |
| 0         | 3 | 2.5000                  |        |
| 3.042     | 3 | 2.5000                  |        |
| 9.126     | 3 |                         | 2.9433 |
| 6.084     | 3 |                         | 2.9933 |
| Sig.      |   | 1.000                   | .746   |

Means for groups in homogeneous subsets are displayed.

a. Uses Harmonic Mean Sample Size = 3.000.

**CAT**

Duncan<sup>a</sup>

| Treatment | N | Subset for alpha = 0.05 |       |       |       |
|-----------|---|-------------------------|-------|-------|-------|
|           |   | 1                       | 2     | 3     | 4     |
| 0         | 3 | .0753                   |       |       |       |
| 3.042     | 3 |                         | .1217 |       |       |
| 6.084     | 3 |                         |       | .1440 |       |
| 9.126     | 3 |                         |       |       | .1693 |
| Sig.      |   | 1.000                   | 1.000 | 1.000 | 1.000 |

Means for groups in homogeneous subsets are displayed.

a. Uses Harmonic Mean Sample Size = 3.000.

**APX**

Duncan<sup>a</sup>

| Treatment | N | Subset for alpha = 0.05 |       |       |
|-----------|---|-------------------------|-------|-------|
|           |   | 1                       | 2     | 3     |
| 0         | 3 | .1160                   |       |       |
| 3.042     | 3 | .1997                   | .1997 |       |
| 6.084     | 3 |                         | .2853 | .2853 |
| 9.126     | 3 |                         |       | .3147 |
| Sig.      |   | .104                    | .097  | .539  |

Means for groups in homogeneous subsets are displayed.

a. Uses Harmonic Mean Sample Size = 3.000.

**PPO**

Duncan<sup>a</sup>

| Treatment | N | Subset for alpha = 0.05 |       |
|-----------|---|-------------------------|-------|
|           |   | 1                       | 2     |
| 0         | 3 | .0797                   |       |
| 3.042     | 3 |                         | .1420 |
| 6.084     | 3 |                         | .1477 |
| 9.126     | 3 |                         | .1597 |
| Sig.      |   | 1.000                   | .205  |

Means for groups in homogeneous subsets are displayed.

a. Uses Harmonic Mean Sample Size = 3.000.

**Protease**

Duncan<sup>a</sup>

| Treatment | N | Subset for alpha = 0.05 |       |
|-----------|---|-------------------------|-------|
|           |   | 1                       | 2     |
| 0         | 3 | .0487                   |       |
| 3.042     | 3 | .0527                   | .0527 |
| 6.084     | 3 | .0550                   | .0550 |
| 9.126     | 3 |                         | .0553 |
| Sig.      |   | .053                    | .367  |

Means for groups in homogeneous subsets are displayed.

a. Uses Harmonic Mean Sample Size = 3.000.

**Malondeahdehyde**

Duncan<sup>a</sup>

| Treatment | N | Subset for alpha = 0.05 |       |
|-----------|---|-------------------------|-------|
|           |   | 1                       | 2     |
| 0         | 3 | .2367                   |       |
| 3.042     | 3 | .2700                   |       |
| 6.084     | 3 | .3667                   |       |
| 9.126     | 3 |                         | .9233 |
| Sig.      |   | .094                    | 1.000 |

Means for groups in homogeneous subsets are displayed.

a. Uses Harmonic Mean Sample Size = 3.000.

**H2O2**

Duncan<sup>a</sup>

| Treatment | N | Subset for alpha = 0.05 |
|-----------|---|-------------------------|
|           |   | 1                       |
| 9.126     | 3 | .5433                   |
| 3.042     | 3 | .5467                   |
| 6.084     | 3 | .6333                   |
| 0         | 3 | .6400                   |
| Sig.      |   | .734                    |

Means for groups in homogeneous subsets are displayed.

a. Uses Harmonic Mean Sample Size = 3.000.

**Betalain**

Duncan<sup>a</sup>

| Treatment | N | Subset for alpha = 0.05 |       |        |        |
|-----------|---|-------------------------|-------|--------|--------|
|           |   | 1                       | 2     | 3      | 4      |
| 0         | 3 | .8500                   |       |        |        |
| 3.042     | 3 |                         | .9667 |        |        |
| 6.084     | 3 |                         |       | 1.1900 |        |
| 9.126     | 3 |                         |       |        | 1.4600 |
| Sig.      |   | 1.000                   | 1.000 | 1.000  | 1.000  |

Means for groups in homogeneous subsets are displayed.

a. Uses Harmonic Mean Sample Size = 3.000.
